# Supplementary material for: DNA methylation is involved in the regulation of pepper fruit ripening and interacts with phytohormones
Source: PubMed Central journal article supplement (PMC7242076; doi:10.1093/jxb/eraa003), 2020-01-07
Supplement: eraa003_suppl_supplementary_tables_s1_s9_figures_s1_s4.pdf [file eraa003_suppl_supplementary_tables_s1_s9_figures_s1_s4.pdf]

## Supplementary Files

**Table S1-S9**

Table S1. Primers for McrBC-PCR

| Gene ID         | Gene symbol       | Sequence                                                     |
|-----------------|-------------------|--------------------------------------------------------------|
| Capana02g001917 | <i>CaCNR</i>      | F: ACATCACAAATTCACAGTTTCTCG<br>R:GCAAGTATCGCTATTTGGTAGTCTT   |
| Capana07g002220 | <i>CaNOR</i>      | F: CCCTAACAAAGTTGTGGCTATTCTTG<br>R:ACCAATTAGAGTATCTACCCGCTCC |
| Capana11g002005 | <i>CaRIN</i>      | F: GACTCCACACTAAATGCTTGAAACG<br>R:TCATTTCATACCAACCACACCATTCT |
| Capana04g001637 | <i>CaCYP707A1</i> | F: TAACTAACATGAAGTGCCAAAGGGA<br>R:AATTTAGCCAATTTGCCATTGGA    |
| Capana00g003114 | <i>CaNCED1</i>    | F: GTTTTGACAGCATAAATGCAGAATC<br>R:GCGTTCGTTATAGAAGAGTGTCTCC  |
| Capana06g000615 | <i>CaCCS</i>      | F: CCTAAGTGTGTATCTATATCCTCCG<br>R:CAGTGAGGCTTGAAGTAGCAGAG    |
| Capana04g002519 | <i>CaPSY1</i>     | F: TGAGCTGATTTATTCTGAATCACTC<br>R:CACACACTACCAGAACAATAGAAAG  |
| Capana03g000054 | <i>CaPDS</i>      | F: TGTGTTCAAATAAGACTTTTCCTTTG<br>R:GTTGTTTAATACTACATCGCCTCAA |
| Capana01g000166 | <i>CaCell</i>     | F: AAAGAGCACGGGTTTCATATGCC<br>R:ACGTGAGAATGATTCGTGTGCG       |
| Capana01g003323 | <i>CaCel2</i>     | F: TATCCTATCAAAATAGGTGTCATGT<br>R:CTGAATGCATCTCAATTGTATCCA   |
| Capana10g002229 | <i>CaPG</i>       | F: YTATAGTTGAAAAGTYAAATYYAYA<br>R:ARTCRAARCCACACCTAAACTATAC  |
| Capana00g004152 | <i>CaPME2.2</i>   | F: CATACTGGCCACATGATGGTATG<br>R:TTCACTCGTACTTCTCTCACAGAAT    |

Table S2. Primers for bisulfite sequencing

| Gene ID         | Gene symbol       | Sequence                                                                                                                           |
|-----------------|-------------------|------------------------------------------------------------------------------------------------------------------------------------|
| Capana02g001917 | <i>CaCNR</i>      | F1: GYAYGAGGAATATTYAAATGAGYTA<br>R1: ACARCTCTRTRRCTATTARCCATAT<br>F2: ATTYATATGGYTAATAGYYAYAGAG<br>R2: CAATRAACTARCCCTTTATRTRTTT   |
| Capana07g002220 | <i>CaNOR</i>      | F1: TTTYGTYAAATAAGGTTYAGATGAA<br>R1: TRCTCCATCTTTAACATRARRTATC<br>F2: ATYGTATAAGTTGAGTYTYGAYAYA<br>R2: CAAAAAATCTCAACTCTCTRAACAT   |
| Capana11g002005 | <i>CaRIN</i>      | F1: YTAAATGYTTGAAAYGTGGAATTTG<br>R1: RAATRTACRTARATCTTACCATTACCT<br>F2: AATGGTTGTYYYAYAATAGTTGAYT<br>R2: TCATTCATACCAACCACACCATTCT |
| Capana00g003114 | <i>CaNCED1</i>    | F1: TATYTTTGAYYAYGAAGTTGGTTY<br>R1: AATCCATAACTATATRCATRCTARA<br>F2: TAGYATGYATATAGTTATGGATTAG<br>R2: TAAARRACTTRTCAARCTATCATCA    |
| Capana04g001637 | <i>CaCYP707A1</i> | F1: TTYGTYGAATTTGGGTTTATYGY<br>R1: ATTRTCRARTTCAAATCCAARTARC<br>F2: YTTYTTTTYATAGGGAAGTAATTGY<br>R2: CTACTRACCTCTATTRARTCTCATR     |
| Capana01g003323 | <i>CaCCS</i>      | F1: AGGAAYTAGAGTTYGGATTYAATAG<br>R1: ACCAATTTCAAACCTACTACTARACC<br>F2: ATATYYTYYGAGAATTTGGAATTTG<br>R2: ARACRARCATTTCCAAARTCTACCA  |
| Capana06g000615 | <i>CaPSY1</i>     | F1: AGTTGYAGTYTTTGAYAATYTGTTG<br>R1: CACACACTACCARAACAATARAAARTT<br>F2: AGGTTTGTTTYAYTTYAATTYTTGT<br>R2: TRATRTTCATRAATTCTRAACTCTA |
| Capana03g000054 | <i>CaPDS</i>      | F: AYAAGAYGGTTAAATGTTAGGTAYA<br>R: TATAARCTRRAAATATRTAATCTTC                                                                       |
| Capana10g002229 | <i>CaPG1</i>      | F: TAGYTTGTATGATAGAGGTTAAATG<br>R: ACARATRRACATTACAAATTTAATT                                                                       |
| Capana01g000166 | <i>CaCell</i>     | F: TTTGGAAYAAYYGTTAGTATGAAGA<br>R: TRCTCTTCAACTARTCAACTARCTC                                                                       |
| Capana01g003323 | <i>CaCel2</i>     | F: AGYACAYYYAAAGTAGTGAAAAAT<br>R: CACATRCAAARARAAATRTRGACTTA                                                                       |
| Capana00g004152 | <i>CaPME2.2</i>   | F: TTYATAAGTAYGTTAYATYGYTTAA<br>R: AARTCTACTTCCAARTCTCATCATR                                                                       |

Note: “Y” and “R” indicates “C/T” and “G/A”, respectively.

Table S3. Primers for real-time PCR

| Gene ID         | Gene symbol         | Sequence                                                      |
|-----------------|---------------------|---------------------------------------------------------------|
| Capana01g004297 | <i>CaCMT2-like</i>  | F: ACCAAACTCTCTGGTGTTAAGCTTGC<br>R:TTCACCTTCTTCTCGGTCGTCTACC  |
| Capana12g000016 | <i>CaCMT3-like</i>  | F: CGAAGCTGGTGAAGGCATGAGT<br>R:GCAGACGCCAAGCATAATGTGAC        |
| Capana01g001654 | <i>CaCMT4-like</i>  | F: GCCTCATCGCTACATTAGAAAGGACA<br>R:GTAAAATACCGCACACCATCGACAG  |
| Capana09g002341 | <i>CaDML1-like</i>  | F: CGTCCAGGCAGAACAAGCTAACATC<br>R:TCGTCTGCTAACTGAAATGATCATCC  |
| Capana10g001947 | <i>CaDML2-like</i>  | F: TGCCTGAACATTCACAAGAAGGTGA<br>R:AAGGCTGTGGCTTCTGTAAGTTGCT   |
| Capana12g002335 | <i>CaDML3-like</i>  | F: CAGTTGCCGCAGTCATACCTATGCT<br>R:CAATGTCTGCTTGCTAATAGGTCTGG  |
| Capana03g000092 | <i>CaDML4-like</i>  | F: TGATGATCAGCATTTAGAGATGGCA<br>R:TACACCATCAGAGTGCATCCGAAAC   |
| Capana10g002486 | <i>CaDRM6-like</i>  | F: GCCAAGGCTAAGGTTATTCTTTGCA<br>R:CAGTTTCTCCCACTCCCAATCAACTC  |
| Capana02g000460 | <i>CaDRM5-like1</i> | F: TGTTCCGGATATTGGACTTGGTCAAG<br>R:GGAGAAACGGTCCTCTGTATGGTTG  |
| Capana07g000549 | <i>CaDRM5-like2</i> | F: AACAACCTTGCAGGCAGTAACAGGG<br>R:TGATGGCTTTATCCCTTGATGTCTTG  |
| Capana05g002234 | <i>CaDRM8-like</i>  | F: GGTATCCTTCAGGTGACAGACAGCG<br>R:TGGAAGCAATGTTTCAGCGATAGAAG  |
| Capana04g000012 | <i>CaMET1-like1</i> | F: CAGAAGCACAGGCAAATAGGAAATG<br>R:CACTCCTAAATATGGGCGTACATGAAG |
| Capana12g001109 | <i>CaMET1-like2</i> | F: CACAAGCACAGGCAAATAGGAAATG<br>R:GTAACATTTGCTCCTTTGTCAATGTGA |
| Capana06g000615 | <i>CaCcs</i>        | F: GATGTTGATCCCAAGTACTGGCACG<br>R:GGCTCTCTATTGCTAGATTGCCAG    |
| Capana01g000166 | <i>CaCell1</i>      | F: CACCATAGAGCCTCATCACTTCCTT<br>R:GACCAATCAAAGCGGCTACGGAT     |
| Capana01g003323 | <i>CaCel2</i>       | F: AATCGATTGATTGGTGCTGTTGTTG<br>R:GAGCAGACCATGGATGTTGTGTTGT   |
| Capana04g001637 | <i>CaCYP707A1</i>   | F: GATCCTTCAAGATTTGAGAATGCGC<br>R:CTGCTAGTCCACCTACTGGGACAGG   |
| Capana00g003114 | <i>CaNCED1</i>      | F: GTGGCTAACTTTGCAAATATGGCT<br>R:CCAGAAATACCAGCTGAGCTCCAAT    |
| Capana03g000054 | <i>CaPDS</i>        | F: ATGTTGGAATTGGTCTTTGCGC<br>R:ACAGGGTTCACAACCTGGCACAGT       |
| Capana10g002229 | <i>CaPG</i>         | F: CAAAGGCACAAGTGCAACAGATGT<br>R:TGCAGGACAATATGGTGAAACATGT    |

|                 |                      |                                                             |
|-----------------|----------------------|-------------------------------------------------------------|
| Capana04g002519 | <i>CaPSY1</i>        | F: TGGAAGAGTGACCGATAAATGGAGA<br>R:GCAATCAACTTCTTTGGTTTGCTCA |
| Capana02g001917 | <i>CaCNR</i>         | F: AGCGATGTGGTTTAAGCATGCTCTC<br>R:ACTTGTGAGCACCATGTGATATGCA |
| Capana07g002220 | <i>CaNOR</i>         | F: TTCTCGGCTCTCTTAGTGACGGAGT<br>R:CCAAATCCAGCAATCCCCTAATCT  |
| Capana11g002005 | <i>CaRIN</i>         | F: CAAAGTTGGAAGAACTTGGTGTGTC<br>R:CAAAGCATCCATCCAGGTACAATC  |
| Capana00g004152 | <i>CaPME2.2</i>      | F: TGGTTGAGTTCTACCGGCGTGAC<br>R:TGAACACGGGATGCTTAGTACAGCC   |
| Capana06g002873 | <i>CaUBI3</i>        | F: CACATGTACAAGACTGACAGGGCCA<br>R:AGACCCGTTCTTGACAACCCAC    |
| Capana00g000688 | <i>CaACCO3-like1</i> | F: TGCTCAAACAGACGGGACTAGGATG<br>R:GCACTTGCAATTGGATCAACTTTCA |
| Capana00g001942 | <i>CaACCO3-like2</i> | F: ATCCAGGAAACGATGCAGTGATCTA<br>R:GCACTTGCAATTGGATCAACTTTCA |
| Capana01g000451 | <i>CaACS10-like1</i> | F: GCTTCTACTGCTGGGCTGACATGAG<br>R:CATAACCTGAACCATCCAGGTTCAA |
| Capana02g000014 | <i>CaACCO-like1</i>  | F: AAGCAATGAAGACTCTGGAAACTGC<br>R:GAAAACCCAAGTTGCACAAAGCAA  |
| Capana02g002264 | <i>CaACCO-like2</i>  | F: TGATTGCTCAACAAGATGGCACTAG<br>R:AACCTAGGCTCCTTAGCCTGGAATT |
| Capana03g002485 | <i>CaACS12-like1</i> | F: AGGAGAGCTTGAGCTGTGGGAGAAG<br>R:TCAGGAGGCCTAACTACGTTCAACA |
| Capana08g000980 | <i>CaACS2-like1</i>  | F: TCGCGAATATGGATGATGGAACAGT<br>R:GGAATTGGTGACGAAAGTGGTGACA |
| Capana09g000540 | <i>CaACS2-like2</i>  | F: AGATTTGAAGCCATGAAAGCTATGG<br>R:AAGAAGGAACACAATCATTGTTGGG |
| Capana01g000175 | <i>CaACS-like</i>    | F: CTCGCTAGGATTCGGATGTTCTGTG<br>R:CTCGTACAAGCGGCGAGATAGGAA  |
| Capana03g000640 | <i>CaARF2</i>        | F: TGTCAGAGTAAGAGTTGGCTGGTTG<br>TCTTCCCTTCTTTAGCATCTGAGCC   |
| Capana03g000145 | <i>CaABI2</i>        | F: GAATGGACATCGTGTATTTGGCGT<br>R:GAATTCCTTCGCCTAGCCACTTCACA |
| Capana11g001454 | <i>CaARR5</i>        | F: TCGGACACATGATCGATGATATCGT<br>R:CCATATCCCGTTATTCAATTCCCAT |
| Capana00g004595 | <i>CaETR1</i>        | F: TCATCATGAACGTAGGAGTTGGACG<br>R:CATCCTTGCATCGCATTTAATCAGA |
| Capana03g000088 | <i>CaDELLA</i>       | F: ATGTCGGAGGTGTATCTAGGGCGTC<br>R:TTGTATGCCAACCCAACATCAAACA |

Table S4. Primers for subcellular localization plasmid construction

| Gene ID         | Gene symbol         | Sequence                                                     |
|-----------------|---------------------|--------------------------------------------------------------|
| Capana10g001947 | <i>CaDML2-like</i>  | F: ATGGACTCATGGATCCCAGCA<br>R:GGAGGCTACTCCTTTGTCTTCATTT      |
| Capana04g000012 | <i>CaMET1-like1</i> | F: ATGGGTTCTCTGGCGGCG<br>R:AGTGGCCTCCTCTTACTCTCAACA          |
| Capana12g000016 | <i>CaCMT3-like</i>  | F: ATGCCGAGTAAACGTAAAGATTCTC<br>R:ATTATTGGACACTTCGTTACAACCTC |

Table S5. Primers for VIGS construction and detection

| Gene ID         | Gene symbol         | Sequence                                                    |
|-----------------|---------------------|-------------------------------------------------------------|
| Capana04g000012 | <i>CaMET1-like1</i> | F: GTTGTCAAACGAGGTGGTTGATTG<br>R: CCACCTCTCTCATTAGCTGCATTCC |
|                 | TRV2                | F: TGTTACTCAAGGAAGCACGAT<br>R: CCTAAAACCTTCAGACACGGA        |
|                 | TRV1                | F: GAAAATATTGCTGCGCCTAACG<br>R: ACCTGCCACGGTTCGAAGTA        |

Table S6. Standard substances used in study

| Chemicals          | Information                                               |
|--------------------|-----------------------------------------------------------|
| $\alpha$ -Carotene | CAS#: 7488-99-5, BOC Sciences. USA, Catalog#: 7488-99-5   |
| antheraxanthin     | CAS#: 640-03-9, BOC Sciences. USA, Catalog#: 640-03-9     |
| lycopene           | CAS#: 502-65-8, RHAWN. China, Catalog#: R007285           |
| Zeaxanthin         | CAS#: 144-68-3, Bidepharm. China, Catalog#: BD2134        |
| Violaxanthin       | CAS#: 126-29-4, Sigma-Aldrich. China, Catalog#: 52444     |
| $\beta$ -Carotene  | CAS#: 7235-40-7, RHAWN. China, Catalog#: R019713          |
| Lutein             | CAS#: 127-40-2, Aladdin. China, Catalog#: X109574         |
| Capsanthin         | CAS#: 465-42-9, Extrasynthese. France, Catalog#: ES-0312S |
| Capsorubin         | CAS#: 470-38-2, BOC Sciences. USA                         |

Table S7. Gene ID and conserved domains of pepper DNA methyltransferase genes

| Database and accession numbers |                 | Name         | ORF length (bp) | DNMT1-RFD Domain |          | BAH Domain |          | Chromo domain |           | DNA_methylase domain |          | Protein size(aa) |
|--------------------------------|-----------------|--------------|-----------------|------------------|----------|------------|----------|---------------|-----------|----------------------|----------|------------------|
|                                |                 |              |                 | Position         | Size(aa) | Position   | Size(aa) | Position      | Size(aa)  | Position             | Size(aa) |                  |
| pepper genome database         | Capana12g000016 | CaCMT2-like  | 3288            |                  |          | 206-313    | 108      | 467-521       | 55        | 354-404              | 51       | 1097             |
|                                |                 |              |                 |                  |          |            |          |               |           | 531-882              | 352      |                  |
|                                | Capana01g001654 | CaCMT3-like  | 3489            |                  |          | 251-359    | 109      | 515-567       | 52        | 399-449              | 51       | 1164             |
|                                |                 |              |                 |                  |          |            |          |               |           | 579-928              | 349      |                  |
|                                | Capana01g004297 | CaCMT4-like  | 4227            |                  |          | 459-561    | 103      | 719-774       | 56        | 609-659              | 51       | 1410             |
|                                |                 |              |                 |                  |          |            |          |               |           | 781-1142             | 362      |                  |
|                                | Capana02g000460 | CaDRM5-like1 | 2820            |                  |          |            |          |               |           | 599-646              | 48       | 941              |
|                                |                 |              |                 |                  |          |            |          |               |           | 660-775              | 116      |                  |
|                                | Capana07g000549 | CaDRM5-like2 | 2175            |                  |          |            |          |               |           | 419-467              | 49       | 726              |
|                                |                 |              |                 |                  |          |            |          |               |           | 482-596              | 115      |                  |
| Capana10g002486                | CaDRM6-like     | 2244         |                 |                  |          |            |          |               | 423-487   | 65                   | 749      |                  |
|                                |                 |              |                 |                  |          |            |          |               | 502-618   | 117                  |          |                  |
| Capana05g002234                | CaDRM8-like     | 2499         |                 |                  |          |            |          |               | 573-691   | 118                  | 834      |                  |
| Capana04g000012                | CaMET1-like1    | 5580         | 101-235         | 135              | 759-891  | 133        |          |               | 1117-1161 | 45                   | 1861     |                  |
|                                |                 |              | 410-564         | 155              | 933-1071 | 139        |          |               | 1200-1543 | 344                  |          |                  |
| Capana12g001109                | CaMET1-like2    | 5577         | 101-235         | 135              | 758-890  | 133        |          |               | 1116-1160 | 45                   | 1860     |                  |
|                                |                 |              | 410-562         | 153              | 932-1071 | 140        |          |               | 1201-1541 | 341                  |          |                  |

Table S8. Gene ID and conserved domains of pepper DNA demethylases genes

| Database and accession numbers |                 | Name        | ORF length(bp) | HhH-GPD Domain |          | EndIII_4Fe-2S Domain |          | Perm-CXXC Domain |          | RRM_DME Domain |          | Protein size(aa) |
|--------------------------------|-----------------|-------------|----------------|----------------|----------|----------------------|----------|------------------|----------|----------------|----------|------------------|
|                                |                 |             |                | Position       | Size(aa) | Position             | Size(aa) | Position         | Size(aa) | Position       | Size(aa) |                  |
| pepper genome database         | Capana09g002341 | CaDML1-like | 6579           | 1300-1423      |          | 1461-1477            | 17       | 1682-1713        | 32       | 1716-1816      | 101      | 2194             |
|                                | Capana10g001947 | CaDML2-like | 6528           | 1280-1405      |          |                      |          | 1663-1694        | 31       | 1697-1797      | 101      | 2177             |
|                                | Capana12g002335 | CaDML3-like | 6885           | 1351-1474      |          |                      |          | 1752-1783        | 32       | 1786-1886      | 101      | 2296             |
|                                | Capana03g000092 | CaDML4-like | 5496           | 992-1109       |          | 1148-1164            |          |                  |          | 1423-1523      | 101      | 1833             |

Table S9. ABA and IAA levels in the premature-ripe and green pericarp of the *CaMET1-like1*-silenced fruits.

| Sample_ID | ABA (ng/g FW)   | IAA (ng/g FW) |
|-----------|-----------------|---------------|
| V-MG      | 34.48 ± 5.36    | 1.41 ± 0.19   |
| V-R       | 82.10 ± 8.33 ** | n.d.          |

“V-MG” and “V-R” indicate green and premature-ripe pericarp of the *CaMET1-like1*-silenced fruits, respectively.

“\*\*” indicates the p-value of Student’s *t*-test was less than 0.01.



**Fig. S1-S5**

*CaCNR* (Capana02g001917)

TCTTCTTTGCAAGGTTATTACATCACAAATTCACAGTTTCTCGCATCGCACATAATCAAGTTATTCGGTGAATAGTGTTAACTGTTTAT  
CTACTAATAATAAAAAGATTTGAGGATGTTAAGGAAGATGATAAGAAAACAAGAGGAGCTAGCAACTTTAAATAAAGAAATCTCAG  
GAAGAGA ACTTCTTTATCGATGATCATCAATCGTGATACTCATAACCTCACTTCTTTTTTCAGCCAAGTCCTAATCTTGTTTTGTTTCTT  
CCAATAATCAAGTCTCCTTGTCAGTCATCTTGTTACTTTCCCTCGAAAGATTGTCGAACTTCACGATAATTGATCGATTCTACCCAAA  
AGAAATCACCTCTCTGCTGAAATTTGAATATGAGATTGCATTGTCCTCAACAGCTTCATTGACCATTAGGTCACACCCTTGGACGCG  
GCACGAGGAATATTCAAATGAGCTAACTTTAAGAATCTCTACACAAA CCTAACATTCTCGTTATACTGCTCAACCATTAAAGCTATAAAAACAACAC  
TACCACTTCAAGAATTACCGACATAACTATGAGAACTGGAAATCTAAGTGGAGACTAATAA TTA TACTCATCAATTGCACTCAGGCTGTAGCTTCA  
ATAATTTAATTTGAAAATTAATAATTAATAATT CATATGGCTAATAGCCACAGAGCTGTCCTAGTGGCTAGTACAGTGCATTATCAATTTAATACT  
AGGTCCTATAGCTATGATAGATGTAGCATCACAAAAAGCTAGGTGCCACTTATGGATATTA AAACTAAA CCAAACCTCAAGGATTATTTATT  
AAAAAAGAAAAAAGCAGCAGCAATTATAATCTGAAACCA TTTAACGAATTAAGTCCACATCACAAAAATTAGACAGAAAATTAGCACACGGCAA  
ACACATAAAGGGCTAGTTCATTGATTTCATTGAACCATGCATTTCTTTACCGTTCACTTCCAATCAAAAATACTACTACTACAAGATTTTA  
CTTGCTTGAAAAAGACTACCAAATAGCGATACTTGCAGGAATTTGTTAATTTATTTTGAGTAATGTAAGTGTGCAAGATAATGATGGC  
TAGTGTTTTTATGGGTA ACTAAGATAATGATGGCTTTAGGTAGACGAGTTAGATATCTAGTCTAGTGATAATGGAAAGCCAGTGCAAC  
AATTGAGCACTCAAGAAGTGAACAAACGCTCTGCTGGACCGACAACGACA ACTGAGAGACCAACTTGCAGTATGAATAATGGA  
AAAAAAAACAAAAAAAACAGTAACTTACTTGGCTCCGTT CAGATATGAAGAACTACCCTAAACTATGTAAATGACTATTACAGGT

ATTTAACTTCGAAATTTTCAGAAAAAGGAATAGCTGCAACCAATTACTAATACATACCCTTGTCGCAATGTCTTAACAAATGAGCCC  
ATGTAACGTAGTTCATGAATACTCGTATTAATGCTTTTGGAGAATGGTTGTGTTTGCCTAGGGTGAAGAAGGAACTCGTAACTC  
GGGTCCGGGAGAACAGGGCAAAGAGTAATTGTGCCACCGTTCAATCGACACCAACTCTTTCGATGCCTTCAAAGCCTGAGGAAA  
AGAGAGAGCGTAGTCACTACAAGCCACTGGCTTTGGTCTATGGTTGACACAACCTCAATTAATTGTCAAATATCTTGTGAACAC  
CGACTAGCAAGCACCAAATTGGATATTCTACTTGTGAACACCAACTAGCAAGCACCAAATTGAATATTCTATCAGCTTCTCCACATC  
CTAAAACAGTGAATACTGATTGCTGAGAGGCTTGCTGACTGCCAATAAAAAACCTTGACAAAAGTTAAGTGGGTCCACTAACTAGG  
AATGAAATCAACGGTAGATATTCAAACGAACTTTAGCAAAGTCCATCATAAATGCTCTTCACATCTCATGTACTATGTTATGGAATGG  
TCACATGTTTCTTTACATAAAAGCTATATCATGTAAAAGTGG

CaNOR (Capan07g002220)

GCCATAGGTTATGAGAATATTATCTAGAGTCATGAAATTATGATTCCGTTAATTTATTAGATTTGAAAATTTGAGATTCTCTGATTTTAC  
TTTTTTTTCCGCCTTATATTACTTGACATATTTGTCAAAGAAAAAAAAAATTATTCCAAAATAGTTGATATTTCAAATCAAGAAAT  
AATTGAACACCTGTTTTTAACTTTATCTTTAGAATTTAACGAAAGTAATTAATTTAAATAGATAGTGACAATATTTAATGAAAATTTAA  
TAGGGTCATATTAGTCAAGTTACAACCCTTATAAATTTCTCCTTAAAAAATATGTAAAAGCAACATGTCAAGTAATATAAGATGAAGG  
AATAATAATTTAGACCAGCTTAATTCAATTGATTAAACCTGAGTTGATATGCAGTTGAGATTGATATATGAGAAATTTTATTTAAATATA  
TTAAAATATATTTTTATTTAATTTGTTATGTATAGTGACAATATAAGAGAGAATTTTATTAGGAATGCAAATGAATTGTAGAAAAAAA  
ATTTGAACCTAGTAAGAATTGGTGTAGTTTAGCTCAATCCTTTAATCCAAGTAAATTGATTCGTCCATCTATTAATTCATTGGACACA

CTTAAGACACCTTTTGACCAACCTACCTTATTTGACATCCCAAATATTTCCCTAACAAGTTGTGGCTATTCTTGATTAATAAAACGAT  
GTTGATATTATAAAAATTATTTACATAATAAGATAACTAGTAAGTTAATTGTGACATTACTATTTCTACTAGCTAGAAAAAGGGGTTAG  
TAAACTATTATGACCGATTAGACTATTGATAATTATGGGTGGAGCTAGGGGACACACAAAGATGATTGTAGTTTTCTAGCATTGGATT  
TATTTGAAATTAGTATTTTGATGCAATAATCCATAAATTTATGTGTAAAAAATTATTAATAATTTAACAATAATACATCTAATCTTACA  
ATATTAATGCTATAATGAGTTTAATTATATTTAAATAGTGTAATTTTCGTCAAATAAGGTTTCAGATGAATTTTCAACTCTAGCTGGCTCTGC  
TTCGTTCTTTTCTTTTTGGTTTTCTATTGGATATTTGGTGTTCACATTGAAACTTTGACTAATTTAGATCGCTCGTTGCAGGACCTGTTTTGGG  
GGTAGCGCCCTAACAGAATTTTTTTCATACCCAGAACTCGAACCCGATACCTCATGTTAAAGATGGAGCAGACCCACCACTACACCACAAC  
TCATATTGATAGTTCCTTCTATTAACAACAATAATATACACAATATAATCGTATAAGTTGAGTCTCGACACATATAACTTTAGTTTTATATTA  
AAAAAGTATAAATAACATAAATATCAACTCTTTCGGAAGTAATTACACTCTCTCTCACTTTTTGAATTACTTTATTCTCTCCCTATTAATATACATAA  
CATAGCCGACATATACATAGATTCTGTGTATATGTTGGGAATTTTGTAATATGTTTCAGAGAGTTGAGATTTTTTGTAATATTGAAAATATAAGT  
TGTGTATTTGTGTAATTTCTAGTTTTTTTTTTTTTAAATGGAGCGGGTAGATACTCTAATTGGTTAAATTTTACGTACTIONTATTAATAGT  
AGTGGCTAGAAAAATTATTTTACAGTATATACTATAGGGATACCAGTGTATAAAATAATTATAAAATGAAATATGCCCCATATATACG  
ATATAAAAAGAAGTTTGGCTAGCCAGCCAAATCTTATTAACCAAACCAAATTTCCAGCTGATTTTCTGTATTCTTGTACTACTAACTC  
ACAACACACACACCATTTCTCTCTCTCTGCTAAACATCCAAATATCATAACCACAATTTTCGCACCATACAATTTACTCTTCTTCTTCT  
TGTTATTATTATTATAATTATATTATATAGTTTTATAATCAGCTGGCCCTGATCAAATTAATAAAAAAAAAAAAAAGATTTTTTTTCGACG  
ATTTTATCTG

CaRIN(Capana11g002005)

TTTTTATAATAATTTAAGTTAATATAATAATAACTGAATTCACAAGTTAAATAGTTATAAAGATTTGTGAATTTTAAATATACAAATATAA  
AGGCTAAACAAAAGATAATAACTAACTTTACGTGCTCGCATTCTGTAAAGACTAGAAATTCACATCTCTGTATATGTCAATTTTGAAA  
TACTGATAGCGTAAAAGAATATATTTATAATTTTAAATAGAACATCTAAAAATTAGGTAAAGGAAGACACATATGAAGACGAGTCGA  
GGCTCTCAACTTTTGAACCTACTAATTTTAAATTTATTATGAATAGAGAGTTCTTATTATTTATCTGATCATTAGAAATTGAAATTGAA  
TATCTCGATTAATTTGAATTTGCATTATAAAGATAACTATTAGGTATGAAAGACACGTATGAAGAGGAGTCGAAGTTTACAAATTTA  
AAACGCATTAATTTTAAATTATTCTAAATAGAGAGTTCTTATTATTTATCTAACCATTGAGAAATTGAAATTGAATATCTTGATTAATTT  
AAATTTGCATCACGTATGAAGAGGAGTCAAAGCTTACAAATTTAAAACCTCCTAATTTTAAATTATTCTGAATTGAGAGTTCTTATTA  
TTTATCTAACCATTGAGAATTTGAAAATGAATATCTCGATTAATCTAAATTTACGTAAATAGATCACTGAAAAAGTAAAACGCTCAT  
TATCAAAGTTTTTTTTTTTTAAAAAAGTTTCTAATTAGGTCAATTGTCGTTTTCTTAGAGGGGGGACTCCACACTAAAT  
GCTTGAAACGTGGAATTTGACTTGACATCCAATTCTATGAAAAAGAAACATAATTCCTACTTATTAATTTCTACTTTTTCTTTTGGAGGT  
TATTCTTTTTCTTTGGACTTTTATTTGGGGATTAATTCAACATAATTGTTTGATAGGTATCAACTAAGATGAGGGTCTATTAATAATTTTT  
ATATCTTTGTAAGGTAATGGTAAGATCTACGTACATTCTATTCTACCTTTTCAAATCCTACTCGTAGAATTATGTTGAGATGTTATTGTTATT  
GTAATTCAACATGATATCACAACCTCTGTCTACCTCCAACCTCAAAGATTGTAAATTCGAATCATCAAAAAACAAAAAGTTGTGGGAG  
CTTTTGAAAAGGGTAAAAAATGATTAATTAATTGAGGATTTTTTGATTCATTAACGAAATCAATAGCTTCTTAATTATTGGTTAAAA  
ATAAAGTTGTAGTCCCTGTTTCCTATTAGTTGATCATTTTACTAAAAATGGTTGTCCACAATAGTTGACTATCCTACTAAATTAAGAAAAC  
AATAATTAATTTTATTTATATACCCTGAAATTAATTCTTTTTTAAAGTGTTACACTTGATTGTAAAGTTTCTAAAAAATTAAGGGGTAAATT

AGTAAAATTACTTTCTTATTIATGATTTTTTTTGAACATGTGTGTGAAAAGAAAAACAACCAACTAATATGAAATAGAGAAAATATTAATGAGTGA  
AATAATATTAGAGGGAAAAAATAAGAGAAGATTTTTAGAAATGGTGTGGTTGGTATGAATGAAATGTTTTTCGAGGAAAATAAGTGTCT  
TTTATTTATTTTTATGTGTATGATACGTAAGTAAGAAATATCATTTTAAAGATATTTATATATAATCAAGACACGATGGAATGTTTCGAGT  
GGGATATATAGAGGCCGTTATTGTGAGGTGGTAGGGATAGGGATAGGGCTAGGGGGTTAGGGTGAAAATGAGGTGCGTGGAAAAG  
ATATGATCAACATGAAACATTATTATAAAATTTATTTTTTCTATTTTTACTAGGCGAATTCTTTTCTTTTTTTTTTTAAGAAATTTATTT  
TTCTATTAATAATTATTTTCAAAAAATTTAACTAACAAAACATGATAAATTAAAAAATGCTTTCCTACACATGCTCATCACTTACAA  
ATTTTAAAGGAAAAAACTTTAGTTACAAAGTTAAATTTTACCATTATGTAAGGACCTTACAACATAAGATTTTGAAAGAGAAGTAAC  
CACAAATTTTTCAAATGAAAAAAAAAAAAACAAAGGAACAATCTTTTTCTACCGTAAGGGGGATGTGATCTGTTTGATAGAATTCAT  
TCAACCTAGTGGGGGGTTAATTTTTTTTTATATATATATAAATCGATTCAAACATAAAAAGCTAAGTACACCAAAAAAAAAA

*CaCYP707A1 (Capana04g001637)*

CATCTATGGAATTTTGTCCTAGAATTAATTAATTCATTATCATCTATGTTTTTTCTTTCTTTTCAATGTTGCCAAATTGTCACTGTTCA  
AGTTAGTTAATTAACTAACTAACATGAAGTGCCAAAGGGAGAAATATCTTCTTTTCATAGGGAAGTAATTGCAATATATATGTATATTCTTT  
ATTACATTGCTAAAATCAAATGCTTTATAGTATAAAGTTAAGTGTTTCGACTCCCTTTATGATAAATTCACCTAGTCTTTTATTCACTTCATTA  
ATAATTGAAGAAGATATGTAGAGCGATCAAATTAATAGTTTATATCGTAATTATAATGATTTGCAAATTTGAGTATCGACTATTCAAGAACGAGA  
ATCATTTTGCAAGAAAAAGATTACAAAAAATATACATGAGACTCAATAGAGGTCAGTAGTAGTCATATCCATTAACACTATTAATAACTG  
AGGGCCAAAGTCGATGGACAACGTTGATTTTTTGTATCAAACTGATAGAAAATTGACGCATCTACTTTCGTCGAATTTGGGTTTATCG

CTTTCGGCAATCTGATGGACAGCATCGGTAAACCAATCCATCAATTTTTTAAATCGACAAAACTGATGGATAGGATCAATTTTTCAAAAA  
TTTCAAAAATATTGATAAAAATAGCTACTTGGATTTGAACTCGACAATTTTACCACTCAATAACACATGCTCTTTGATGAAATGTTTTCCAT  
CATTTTATTTATACACTTCAACTATAATTTTGCACCTTAAAAACAATAGAATCTGTCGATTTTTGAAGAAAAAAAAAACAGAATGTG  
TTGGTTTTATTTAATAAACTTTGTGGCAAAAAAATTATTTTTAGTAGTACTTATAACAAACAAGTAAATTGTAATCTAAAGTGATTA  
GTGTATTAATATGTTTGAAGCACTTACCTTTTATTTCAATTTGGATGCCAAGTCATGTAATCTAAAGGCTAATTTGCTTTTAACTGCTT  
ACTTTATTTTTCATTTCAATTATGGATACTAATTAATGTATTCCATTATGCTCCATAACAAATGCAAATGACAATTATGTGAAATGAATT  
GTGCCAATATAATTAATATTTATCGATTTTAAATTTAAGTTTTAAAAATCATATTCTCGGTGAAAATAGTCATATTAGCACCTGATAT  
TTCACTCACTTATCCACAAGCAAAGCTAAATAGCTAATCCCCTTCTCTCATTTTGACCATATCCAAAAATAAAATACAATAAAAGA  
ACGAAAGTCAAGAATTCTATCCATTTATCCATGATAAAGATTTATTCACACGCAATATTTCACTCACTTATCCTCAAGCTAATTCCTT  
CCTCTCATTTTGACCATATCCGAAAATAAAGAACTCTTATTCCTGGATAATTCCAATGGCAAATTGGCTAAATTATATATTTAACTTAC  
CTTTATTTGCGAGGATAATTATAAGTGTTGTACATGTTTGTAACCTATCTACATTTTATTTCAATTTGGACAAGTACTAACTGTAATTTAAT  
TATCTAATGTAAGTGTAACATTGTAACAACCTTACTATAAATTTCAATTTAATTATGTGTAATTTTGGTAATTAATGTTAGTTTAAAGTGCC  
AATATTATAATAATAATAATAATAATAATAATAATAATAATAATAAACAAGCAATATGCTTGTTAAAAAAATATTACATAATCCCTCT  
AAGCGATCGAATAATATTTATTTCACTCGATATTTATGTCCAAATCCTAAAAATAAAGACAAATCAGGACTTATCTCAAATTGTAGTA  
CTAGTATATTCACCTATTCACACATCTCTATCCGCCCTTTCATGCCTATATAAAGACTCCCATCTCCATTCTTCAACAACAACAATAA  
CAACAACAACAAGAAGAAAGATCACTTCATTCAAATTATTATTTGCTACAACAACAAGTTGTTTCATTTATCCTACCTATATAAC  
AAAAAGAAC

CaNCEDI(Capana00g003114)

TCAAAGATTCAAATCTTAAAAATAGTCTCTAGCATAAATACACAATAAGATTGCGTATAATAGCAGTGAAAATGATCTAACACTCTAA  
TGTTGACACCTCCCCCTCCTCCAACCCACCCCTACCAACCCCAAGTTTTGACAGCATAAATGCAGAATCAGATTGCGTAGAATA  
GATCTTTTTAGTTCGATCTTCTCTGAACTCCATATATAAATTCTTTTTACATACAATGAAATCTATCGGTAACCTCTTTAATGACTT  
TCTTTGAGACAAATGAAGTTGTTACAAAAAAGTTTGATTGTATATACATTCATTCAAATTTTTATCATTTACAATTATTCTATTATAG  
ATAAGTGATAGTGTATTTTCTATATTTGTGATTTTTTAAATTGAATAGTGTATTTTCTATATTTGTGATTTTTTAAATTGACTTAATTAATA  
ATTTAATATAAACATCAAATACAAATGATATTTCTTCGTTGAATTCAAAAAAAATATTTATGATTTTATAATTTAATTGTACCGTTTG  
ATGTAATTATCGAAAGCAAATTAATGATATTTCTTTCATTAAATTCTAAAAGGAAATAGAATATTGAACACAACATAACTTTGTCTAAT  
TTAAATCAAATCAAACCTAACGACCTTATACTTTTTCCATTTTCAACGTCTCTTTTCACATCAATTATTTATCTTTGACCACGAAGTTG  
GTTCAAGAAAATAATAATGTAAATGACTTTATCTTTTTCGATTACTTCTACTTGTTTTATTGTAAATCTTTCGGTGTTAAATTTCTTTGATACATCC  
CATATTAGCATAAACTTTTGACTTATTTGAAAAGACTTGTACCTTTTTGCAATTTTTCTAGCATGCATATAGTTATGGATTAGACAAATAGATATA  
TACTTGCAATAAACTAACTATTTTAACTTAACTCTTATGATGTTCAATAGTATACTTACATTATTATTATTTGGTATATATATACAAAACAGATACA  
AATAAGAATTAGAAAATTCACAAAAGAGCATCAAAACATTTAAAAAATGGAAACCACAAATATGATGTAGGAGAAAACATGTACGTGTCTCAAAGA  
AAATTCAGTAATTAATAGTTTATACTTCGTACGTATACTATAGGATCATTAAATTAATGATGATAGCTTGACAAGTCCTTATGGCGGAGACAC  
TCTTCTATAACGAACGCAATTAGATACCATTAATTATTTGGTCAAAAAAATTTTTATATCAAACCTTCGTTTTCTAAGAAAGAGTGGAC  
TAACTTGCTAATACTTTAAACCAATACAATATAAATATTAATTTGAATTAAGGGTGAAGTTTCACAACCTCTATAATCATGAACTCAA

AACCATATATAGTTTAAATTGCAATTATAAATTGTTTTTACTCGATATAATCTTACATTGATAATTGAATATAATTTTTCAAATTA  
GATAATTTATTATACTAAAACTTTTACCATGGGCAGGATCTGAAGAAAAGCCGGAGCACAGGGTCTATAGCAAGCATTTACAACATA  
AGAGCATAGTAATAAGTATGGATTGTTAGGTTGTGTTTATCAGATTTTTTCATACAAGCAAATGTAGGGACCCTTCCCCCTCCACCCC  
ACACCCACATGGGTCATTTGTTGTATTATTAGCAGTAATGTTGTACTACTAGTTAAAGGGTTTTTAATCCTCCAAATATGCATTTTTCA  
CATATCCAACACGTGGTCTTCTCCTACATGTTAGAAGTGGACCATCATTCCACAGTCTCTCCCCCCCCACTCTATATATAACAATTCCCC  
GTTCTCTCTTCTCTCCCTCACAACCAAACCAAAACTCACCTCAAAGAAACCCAAACAAAAAGAAAGAAAATAAACTCATCTCCT  
CACTTCCCCACTTCTTTTCTCTCTACAAAATTCTCACATTTTCCCAAATAGTACTACTTACTACCATACACAAAAACATCAAAAAAAA  
TAGGTAAAC

CaCCS (Capana06g000615)

ATCAACCATTTCTTCATTAATTGAAAATCTTTAGTCAACTGTAGAATTTAAAATTCAACATTTTGGTGTATGCCTGGATCTTTTTCGGA  
ATTTCTGTTTACACGATAGAGAAATGGAATAACTAAACCACTGCTTCCCCTGGCACACCACTCTTGGAGCCATATGTTGGGTTAGTT  
AGAAAGAAAGGAACACTAAATTTTTCGAAGACGAATGATATTGTACGGCAACTCAACACAAGTGGAGAGGAAATTGCTTATCTTAG  
AATAAAACATAAAAAAGAATTTACCTTGTGTTTTAGAATAAAACACAGAAAAGGAGTTATCTTAAAAAAAAAAAAAAAAAGGAAGAAA  
GGATCAACTTTGAAAAAATTATGCGTTTTACCATTTAAAATTGAAAAGATAAATATTCTTTTAAAAGAAGTTGTTGAATGGAAAATAT  
TGGAAGAATTTCAATTTCAATTTACAAAAATAAAGAGTGTAGAGGGTATTTTTGTAAATCAATATTTTTTCTATAAAAAATATATAAGAA  
ATATTATTTAATACATCAAATCAAATACTGTATAAGAAATAATGTTAACATAATTAATGCAAGTATAGCTAATACCAACATTACTAATG



CAAGTATTACTAATACACCATATTCTATATTAATCTTATATACTCTACCAAACGACCCTAAGTGTGTATCTATATCCTCCGAGAATTTGGA  
ATTTGCAAATCCAAGTTTTGTATCTCCCTTTCCAGAAATTAAGATAATTCTGGTGCTTTTAGCATTAGAAAAGTATTTATTGGGTAGGGAAAT  
GTCATGACTTCACAGCATTAAAGCATCAAGGGTATAACTTAATGAAATAGTGGTCAATGAATTATATTGAGAATGACGAGGTCTCTGTTCCAAC  
TTGGTAGACTTTGGAAATGCTCGTCTGGACGCCGCCATTCTTTCTAGTCTTGGTGCCATTCTATTTGGTCTGAGAATGGCATGATGCC  
AAATTCTACCTTTTCACAATGAGCATTTCGACCTACTCTTCTTTTTTCGACTCATTGACCTACTAGGCATTGGCCAACCTGGCTAAC  
ACTTGAGGAACTAGAGTTCGGATTCAATAGAATCTAATAATTTAATCAAAAGACTTCATGTATATTGAAAAATCTATTTATAACTAACTTTAAATC  
GGCCTTTACGTATCGACGTAATCAAAATTGTGTCAGCTTGCCACGTGGGGTCTAGTATGAGTTTGAAATTGGTCATAGGGGCCCAATTCC  
ACTAATACAGCTGCCGTCCATGCACTACAAGACAAATACACCACTATGTTTGTTAGTGCTTGGTAAATGTAAAACAAACTTTTGATG  
AGAATCTATTCGTGGCATCGAAGTGCTGCAAATTGGCTTTTACCTCTGCTACTTCAAGCCTCACTGATTTTCACCCCAACTTTCTCAT  
TTCCCTTTCAAGGATTTGATTTTCCAGTTGGGCATGTTAAAAACAACAATTTTCCCTCAAACTGTAGAAATGATTTCTCATATTTTAA  
TCAGTCAAATTATTTAAACAAGAAGTTGATTTTTTTTTTAATTTTTTTTTTTTACAAAAAATTTCAAATGTCAAGTAAGATTTTCAAAT  
TGAAACTGAATAAGCTGCGACTTTAGAAACAAAAAACTAAGATAAGTAAAAATACCAAAAAGAGTGAATCACATCAATTGAATTCT  
TCCAACAGTTCGTTTTTTAGTTTCTGTTTTGGGAAGAGGAGTACTACAAGGTAGGACCTCCAACAATCAACAATATCTAAGTTGCAA  
AAGTTTTTGTGCGTTTTTTAGTTTCTGTTTCGAGAAGAGGAATACTACAAGTTCGTTTTTTAGTTTCTGTTTTGGGAAGAGGAGTAC  
TGCAAGGTAGGACCTCCAACAATTATCAATATCTAAATTGCAAAAATTCAGTTCGTTTTTTAGTTTCTGTTTCGGGAAAAGGAATAC  
TACAAGTTCGTTTTTTAGTTTCTATTTTGGGAAGAGGAGTACT

CaPSY1 (Capana04g002519)

TAAGTTCTGATCTATTAGAAACAACCTTCTCTATCTCCCAAATAGGTTGGGGTAAGATCTATGCACACGCTTGACCTATTTACGTGAA  
ATAAGCTGGTCAATTGTGAACAACATAACCGATAACAAGTGCAGCGCAAGGGGTCCAAACCTTTTTGTGCGAAAAATTATATAGTAT  
ATGTGAGTATTGTGATCACTTTAGTAAAAATATTGGCCACACTATTATTAACAATTTATATGGTTACAACAATTTCTTGATGATAAAAT  
GACTTACTTCAAACCTTGGTTGAAATTTAACCTAAGAGGACAAAACCTTGAATCCTAATCCAAGTCAATTTGGGATCCTTATGTTTGAG  
ATATATTCAAAATAGTCCTCCAAATCTAATTTTTTGAGCAATTATGGTCCTTTGAAGGTGAATACTTTTTGTTTTGTTTGTAATATTTA  
AGAAATTCTATCTGTTATCATCTACTTTGAAGAGTTCGATGTTGCTTACTGAGGTGCAACTTCTCCTATTTTTTTAAAAATTATTTTTG  
GCATCTAGTGAAGGGAAGTGTGATGTAAATGATAAAGTTATTGTCATGTCATTAGGAGGTTATGAGCTTAAGTCGTGGAAATATTTT  
TCAGAAATGCAACGTAAGACTACGTATAGTAAATTCTTGTGGTTAGATCCTTCTCGAACTCCATATTTAATGGGAGCTTTAGTTCATT  
GGACTGCCCTTTTATTTTTTGCCACTAGTGTAGTTTTCTAGGATTTGATGAGACTTCTCGATTTCTCGAATTAGAACCTTTTTTCACAG  
TTTTCGGCAAACCTTAATAGATAAAATTTGTTAAAATATTTGACAGAAATAAAAAGATGTCCACTTTTGTAATTTAAAGGACTAAAA  
CTGCTCAAAAATACATTTAAGAACTAATTTAAACCTAGTACCAAACATAAGGGACTATTTTGTCATAATTTTGAAAATTTACGTGT  
CTTTATTGTAACCAAAGAGTTCATAGCAACTTAAAAAAGGGGTAAAATGAGCTGATTTATTCTGAATCACTCAAAATTTCCAATAAAA  
TTATACAAAGAAAAATGAAAAAAAATTACGTAATATAATAATTTTTAAAAATTAATAATGAATGCTATAAATAGACCAAATTATGTG  
GAGCAATAAAAGAGGAGAAAAACCAACAACTACTTGTAATTCCTGAAGAATACAAAGCAGACATTGTTGAAAAGTGGCCATTTT  
TGCAAGGTTTGTTCACCTCAATTCTTGTTATCGAATTCATAACTTTAGTTCAAACCATGTAACATGTAACTTAAAAATATTATAAAATTTAGAAT  
TCATAAACTTTAAATTTTACTCGTTATGTTTATTGATATACAAAGTTGCAATATTTAACATTCTTTGTAACCTTCTATTGCTATTGTAGTGTCTTG

TTGCTATTCTAGGGGCGGAGCTAGAGTGTCAGTTACGCATTCAGTTGAATTCAGTAACTTTAGTTCAAACCCCGTGATGTGTTAACTTAGAAA  
TATTAGAGTTCAGAATTCATGAACATCAAATTTGACACGTTACATTTCTTGATATACAAAGTTGCAGTCTTTGACAATCTGTGTGGCTTTT  
TATTGCTATTGTAGTGTTCTTGTTGCTATACATGGGCGGAGCTAGAGTGTTAGTTACGGGTTTAGTTGAATTCAGTAACTTTAGTTCAGACCCC  
GTATCGTGTTAACTTAAAAAATATTAGAATTCTGAACCCATAAAGTTCAAATTTGACTCGATTCTTGATGTATAAAGTTTCAATCTTAA  
ACATTCTTTGTTAACTTTCTATTGTTCTGGTAGTGTGTGTGTTGGTCTACTGGGCGGAGCTAGAGTATCAGTTACGGATTTAGTTGAATTTA  
GTAGCTTAGCTTAAACCCTGTAACATAGTAACTTAAAAATATTGTAAAATTTAGAACTCATAAACTTCAAATTTGACTCATTACATTT  
CTTGATATACAAAGTTGCAATCTTTGACATTCTGTGTGGCTTTTTATTGCTATGGTTGTGCGCTTGTTGCTATACATGGGCGGATCTAG  
AGTGTTAGTTACGGGTTTAGTTGAATTCAGTAACTTTAGTTCAAACCCCGTAATGTGTTTACTTAGAAATATTAGAATTTAGAACTCA  
TAAATTTCAAATTTTGGTTCGTTACATTTCTTGATATATAAAATTGCAATCTTTGACATTCTCTGTGGCTCTTTATTGCTATGGTAGTGT  
GCTTGTTGCTATACTAGGGGTGGAGCTAGAGTGTC AATTATGGGTTTGGTTGAATTCAGTAACTTTAGTTCAAACCCCAT AACGTGT  
TAAACTTAGAAATATTAGATTTTAGAACTCATAAACTTCAAATTTGACTCGTTACATTTTCTTGATATACGAAGTTGCAATCTTTGAC  
ATTCTGTGTTAACTTTCTATTGCTATTGTAGTGTTGTTGTTGCTATACTAGGGGCAGAGCTACAGTGTGAGTTATGTATTCAGTTGAATT  
CAGTAGCTTTGGTTCAAACCCCAT AACATAGTAACTTAAAAATGTTAAAAATTTAGAACTCATAAACTTCAAATGTTGACTCGTTAC  
ATTTCTTGATATACAAAGTTGCAATCTTTGACATTCTTTGCGGCTTTTTATTGCTATGGTTGTGTGCTTGTTGCTATACATGGGCGGAG  
CTAGAGTGTTAGTTACGGGTTTAGTTGAATTTAGTAGGTTTAGTTTCAGACCCCGTAATTTGTTAACTTAAAAAACATTAGAATTCTGAA  
CCATAAAGTTCAAATTTGACTCGGTTCTGACTTCTAGATGTATAAAGTTTCAATCTTTAACATTCTTTGTTAACTTTTTATTGCTATAG  
TAATGTTCTTTTTGCTATACTAGGGGCGGAACTAGAGTGTAAGTCGAATTCAGTAACTTTAGTTCAAACCATGTAACCTAGTATCTTA

AAAATATTA AAAATTTCGGAACCCCATAACTTCAAATTTTAGCTCCGACTATAACAAGAATAGAATTTGAGAGTGGCCTAAAATTTAGT  
GTCCATTGTTTAGTGGAGAACCAATTATCAAGGTTTGTTCCTTCACTTCTTGATATAACAAGTTGCAATGCTTAACATTCCCTGTAA  
CTTTCTATTCCACTGGTAGTGTGCTTGTGCTATAACCGGGGCGGAGCTAGAGTGTAGTTACGGGTTTGGTCGACTTTAGTAGGGCA  
GCCCCGGTCACTACAGCTCCCGCTATGCGCAGGGTGGCGGGAAGGGGCGGACCACAAGAGTCTTTTAACATTTTGTCAAGGAGCTG  
TTTCCACGCTTGAACCGGGGACCTCCTAGTCACTAGAATTCAGTAGCTTTAGTTCAGAATCCACAACTTCAAATTCTAGCTCCGCC  
TACTAGTGACTATAAAAATAATAGAAAATGAGCACTTGCCTTATGAATATAGCTTCTACGTGTACCAAATTAGAAAGTGAGGTGCTTA  
TTATAATCTAGTTGACTAAATATAGAAAGATCCATTACCTCCAGAAAGTGTGATTCCACTTTGTGCTTTCAATAGTGTA AAAATAGTTT  
CTCAAACATCCTTTCTTTGTGCCATTGGTAGGTAAGATTGCTGTTTTGTCTTGT TTTGGAGATGTTTTTAAAGTTAAAATTGTTTATA  
CTCAGGAAGTCTATAATGCTGGTTACGAGTTCATGTGAACTCAGTAGTTTTCGCTAAGCAATCCACTAATATCTATAAATTTGACC  
GTGAACTCCGCTTGTATCATTTCAATTA ACTTGAGGTCGCTATAGGAGCCGATAAACTTCCA ACTTCTGAATCAGTTTTTGT TTTATACT  
CAAGTATGATGTTTGGTTTATCTCATATTGCAGAAGCCAAGAAATAGGTTATTTCTTTGTTTGATAGTGGAAGTATACTCTAGTGGGA  
ATCTACTAGGAGTTACTTATTTTCTATAAAGAAGACAAAAACCTTGGAGTTGCTTTAGACAACCAAGGTTTTTCTTGTTTCAGAGGAA  
TATAATGTAAAGTATAGTAGACAATTTATTTTATCGTATACATATTAATAATTATTTTCACGATTCGAATATATATAACCGATAGATCACA  
CAATAATAAATATTAGTGTTGCTCATCGAAA ACTCCGATGCACTAATGTTTGGCACTAATTCTTAAGATAGATAACAAACACATCTAA  
ACATTATTAATTAAGTGTATATATAACAATATTTTAACTTATTCTATAACTGGATTTCAATTTAAAAAAAATAATGATGTGTCATGTC  
CCAAAGTTAGTTGCACTCTAAAAAAAGTTAAAAGGTTTTTAACCAAAAATAACTTCTTGACTATAACAAATTAGAGTTGGAATTAAT  
AATCAAACATATAAAAATTGATATTTTAAACAAGTTTTACACCATAATGTAGCAATCCATCCTGTTAGTGATATTGTCTGCTTTAAA

TCTAGGAATGTACGTCTTTAAAATGCGTCATTAGTGGGTAAGACATGCTTACTTAAAACACGTCATTAATGAATAAGATTTGTTTACT  
TATATACTCAACATCTCTCATATATTTTACTGATGTGAAATTAGTTATCTTAAACCGGAATGTCAGTACACTTCATTTGTATCTTTTTTTA  
TATGAGCCATTATCATTTACATGTAAAAGTGCACCTTAAAGCTGGTTAAGCTTATAAACTATAAATTGTTCATTTTTCTCGTTAATA  
ATCAATATCTACTTAACAAGGCCTGTTTAATAGATGATAATAGTTTAAAGTAGAAAAATGAAATTGTAACCTTTTTTACGACTTTTAACAT  
TTCAACTATCAGTTAGTAATATGCTCATCCATTACATATTTTAAAGAGAACAAAGAACCATTAAGGTTAAAACTTATTATAAAGT  
TAAATATTTTTTCAGTATATATGAAAGGACCTTACAAGTTACAACCTAAATCTTTTGAAAGAAAAGTATCGGTCACTACTAAGTTTTCC  
AAGAAAAACAACAACAAGGAACAATCTTTTTCTAC

CaPDS (Capana03g000054)

AGTGAGCTTG~~TGTGTTCAAATAAGACTTTCCTTTGTAGAATATGTGGCGGTATTATATGGCATTAAAGAGATGGATACTAACAGGTC~~  
~~ATTATCCTTCTCAGTAATTCACCCTTTAGTTTTCAAGTCAAGAATTCAAAGCCAATCCAATTTGACAAACCTAAGTTACTTACACATT~~  
~~GATTGTTGATCAAGAATATCCATATCATATAACCAATACATATATGACAATTATTTTTTAAATAGAGAAATGATTATTTATGTTAATTTTCATTTTT~~  
~~GTTTTCTGTCTAAAATAATCATTAAATTATTCTTTTTTCACCCGAGATAAAAAATAAAAAATATTAGCTGTACATTTATTTAGTTAAAAAGAATTTGGT~~  
~~GTAATTCGTTGACAACTAAGACTAGTTAGTATAAGGGATAAAATTAATGCGTGTGGTATCTCATTTCCTCCTGAGAATTTACAAGACGGTT~~  
~~AAATGTTAGGTACAACTTAAGACATAAAAAGAAGAGAACTTTTGATCTCCCAAGTGTGGGTGTGGTTATGGTGGGAGGGACGT~~  
~~GTCAAATTTTGGAGCGTAGCCAAACAGTCGTTCCAGTTACAGCAGATTGAATTAAGAAGATTACATATTTCCAGCTTATACCTAATA~~  
~~ATATTATCCCATCTACGGAAGTGGCCAAACCACCAAAAACAGGCATTTCCACCCAAATACCAGAAAGATCCAACAATATAATACTT~~

ACTCCCTTTCTCCCAAATTACTCTTCATAAATTCACATGATACATTAATTAAGAAAAATAATCATAAATTGATATGATACATTAATTTAA  
AAAAATAATTAATAATATGATTAATTTATTATAATATATCTATTAATGATATTTATATTTTAATTTGAAGAAAAATTAATTAATATAAAG  
GATAAACCTGATTTTTTTTTTTGTATTAATTAATAAAGATAAGTAAAATGATAAATTAATTAAGAAAAATTGATTAATAAAAAAAGAC  
AAGTAAAATGAAAAATGAAAATAGAAAATTTGATACAGGTAATTTGAGGCGATGTAGTATTAACAACATTTAATTAAGCCTTCCTA

CaPG ( Capana10g002229)

ACTCATTTAATTATATTTTTATTCTTAATTAGATAATAATAAATAACTTTAGTTTTTAATACAATAATTTTTAAGTATCTTGTATAATATTTT  
TGTCCCTAGATCCTCATGCATTTTATAATTATTTTCTTCGTAAAGTCGTTGGTTTGATAAGGTTCTACCCATTAATGTAAACTATAAATTA  
ACATTGTTTTTTTTTTTGAAGATCGCTAACATCGTTGCTACTCCATTCATATTTGCTACTTAACTAATTATAAAAATAAAAATAAATTTG  
TTTTAGTAATAATGTATTTATACTTGCTTTTACTTGTAATTTATGTTGATTTTTTATACATGATGGTAATGTATATAACTGATAAAAAAAC  
AAAATTCATGTGGTATAAACAAAAACAAAACAAATAAATCTTCTTCATGTGAAGATCATATGGTATACAAAAAAACAAAATTCAA  
GTTATTCACGACATGACTAGTCTTCAGATAAAAAATTTATTAACAGATTTGCATGCATTTTAAATTTATTTTTTTATTTATATTTTTTGTAAT  
TCAAAAAAGTTTTAATTAGGAAAGTTAATGATTTATATAATTTGGCAAAGCTAATTTATACTAATATGATCGAAATATACACAACATTG  
TAATTAATTGAAGCAACGGAAAACACCTTAACAAAAAATTTGGCTCATGCATTTATTACGAAATGTAATTTTTGGTTAAAAGAAACT  
AATTAGTGATGATTTTTTTTTTTTTTTGGTTGTAGCTAATAATCTCATGGTTAGTTGATGTTGCTAACTGGTTATATCAGGTTAGGGAAAA  
AGCATCGTTTCCATCCTAAACTATACCTGAAAAGTCTAAGCCACACCTAAATTATACTAGTGACCTATTACATACCTTAACTATAAGA  
AAGTGATATTATTACCTCCCCGCGATCCCATTCTAAGGCGTGTGTGTTACACTTATTTTAGGCGCATCCAGCCTATTAATAACGAAAGTA

AATGGCTAAAAACATTAAGGGAAAAGTCAACGTTTCTACCCCAAACCTATAGTTGAAAAGTCAAATCCACACCTAAACTATATAAGTGACCTATTA  
CACACCTTAACTATAAAAAAGTGATACTTTTTACCGACGTGGTGCTGACGTGGCAGCGCGTGTA AACACCCACACTACATGCAAGT  
GGTGGTAGCCTGATAGGGTGTAATAGTTTCACTTTCTTATAGTTTAGGTGTGTAATAGGCCACTAGTATAGTTTAGGTGTGGCTTCG  
ACTTTTCTGGGGTGGAAACGATGTTTTTTCCCTATCAGGTTATTATTATTATTTTTTGCATATCATCACTACATTAATATTTAATGATAG  
TGACAAATTCAGAATTTTGGGATTATGGGTGTCTCCGAGAGATT CGAACACATATTGATGATCAA AATTTAAAGATTCTGCCCAGGG  
TCGGATCTACAGTTTCGGGTGGGAGTTTTTCGAGAATCTCTACCTACTATCGTAGATCTCGTAAATATATGAAAAACAAAAAAGTC  
ATAAAATTTTGTAGATGGAACTCACACACAAATTTTAGGCTGATTTGATGGCATAGAAAGGACCCTTGAATTA AATCAAAGCAC  
TCAGTTATCTTATTGGCTTCCTGATGCTTTTTGACTATTATAACAATTTTTTATATAATTATACTTTATTTGTGTCAAATTTAATGGGTGTT  
GAAGCACCACAAAAACGCGTAGGTCCGTCCCTATTTAATGAAATTA AATAGATAACAATCTTAATACATAAATGAAGGTAAATA  
GATAGATCCTACCTCCAAATCATATTTTTTTAATGAACGTGAAAAGAAAATACGATAAATAATTTAAGACGAGAGCCAATAGAAA  
TTGGCAGAATGTCAAAGAACTCTTTCGTCTAAATCTCTCATCCAAATTTAAATATTACA ACTATAGCCATAATTATCTATAATAA  
ATTCAAACCCTCTAAAATCTATAAATAGCCAAACATTTTG

CaPME2.2 (Capana00g004152)

TTTGATCTATCGAGATACATAATTAGCTCCTGATATATTCAATGAAGAGATATTTTTCTTTGTAGAGATACATAAGTAGCTCTCGATACA  
TTTTTCGATTTTAGGTCTGTCAAGATACATGATACATCCAACGAAAATATTTTTTTTTGTTGTTGTAATAGATACGTAATTAGCTTTTG  
ATCATTTTTTTTTTCCGATTTTAGGTATGTGGAGATACGTAATTAGCTCACTGATACATTCAGCGAAAATACATAATCAGTTGATATTTT

TATGAGGATAAAGATTTCGTGAATATATGATAAGTTAAGATGTATATTTATTTTATTTTAGCTTTTTTTTTCTTCCCTTCAAAGATGTAT  
AATGAGTGGTTTGATTTTGACAAAATATTTGCTCTTATGGGCCTCCCCTAAAAGATTTAGTGCCATTTGTGTTCTTTCATTGTCTTG  
ACAAAGATATTTGTCTAGGTGATAATTAGTGCTCTTTTCTTCTACCAATCACAATTTTTTTATTTATTATTATTATTATTATTATT  
ATTTTATATCAGAAAAATTAATAAATTTCTTAATATCATTTCATAAGTACGTTACATCGCTTAAGTTTTCTAAGAGAAAACTTCAT  
TTTCTTGAGCGCTTCTTCCCCTATTATCAAATATTCTTCAAGTTTATGACATTTGTTTCGCCAAAAAATTTGCACATTAATTTTCGTATCT  
CATACGTGTATGATAATGGTCTGTTTACGTTCTGTAATTATCTACATTCTGTAATAATGACTGTAAGATGACATTTTGTGCATCTTCGT  
TGATAAGCTTTGATATTTTATTTGATACTCCATGGTTTCATGATGAGACTTGGAAGTAGACTTCTTTTCATTTAAATATCTCAATATTA  
CTCAAATTTTCACACTTTAATATGAAAAATGAAGAGATTTCGATCCATCCTAATAATCTCACTTCTAGAAAGTTCACTAACAGAATAT  
GTAGATGGTCCATAGGACTATGTTGTTTACCTACTTTGGACAAAGTGGTTGTGCTTTAAATCAATTCTCTCAAATTTATCACATTTTC  
TAATCTACACCATATAATAATGGAGATATTTGTGAGTAATGACTTGTTGAATGATCACTAGCCATGCCAAAGTACCCAATTTTCTGGGCCAA  
TATAGTACCCAATCACTATATATTGTATTGTATTATATAGTAGTATTAATTCATAAATATAATTTCAATGACTCCAAGAAAAAGTAAAATAT  
AAGGTAAAGTTACTTAAAAATAAAAAGAGATAAATACTCAATTACCCTGAACTATATCCAAAAAGGCTACGATACACCTTAATTTAAGGGGATCCT  
ATTATTCCTGAACTAATTAAGTATAATTTAACACCGTTAGTGCCTACGTGGCACAACACACTGAAGTGTGCCACGTAGGCACTAA  
GGATGTTAAAATTACATTTTAAATTAGTTCAGGAATAATAAGATCCCTTTTAAGTTGTTGAGGTGCGTCGTAACATTTTGGATATAGT  
TCAAAGGAATAATTGGGTATTTTCTCTAAAAGAAAAATATGATGGAGCATAAAATAGATTTATTAATACTAAATGAAGACAAAATG  
AGAGAGATAAAAAAAAATATAAAGTAACTAAATAATCAAAACCAAATTGATTCCTGAGACTTTTCGTTGTTATCTTATCATAGAGA  
TAATCATACAATACAATACAAAAAAAACCTTTTAAGTAACAACCAAACAAACATTACGCTAAATTAGGGATACTTGTTGATTTTCA



GCAAATAGAGAAATCTGCAGGGACCAGTTTGTACTCTATTATTCCTCACATATGCACCCAACATATCGAGGACAACATCACTAGCA  
AACAAATTATCTCAATCACTCTCATCTAGTTGGGAGGTCGATAAGACTGTGGGACCCTTTATCAGACCCTGTACAGAGCGGCATCAGA  
CTATTAGCAGAGAATTACTCAAATCCAT

CaCELI (Capana01g000166)

GAAAACTATGAAAGAGCACGGGTTCATATGCCCCGATGGTTACACGTAAAATCATATCGCCCCTGCATTTCTCCCGCCAAAACCT  
TCTCAGTCAAGCTCAAGCTACTAAATATACTCAGCATCGCGATTTACATCTCTTATGTAATTTGCTAGCTATTACACATAAACAGGTTA  
TCTAGGGATTTTAATTTTTGAGGGTTCCAAAAGATTGTAATTAATTATGAGAATCAAAGTGTGACGCTAATGAATATGGGCTCATGA  
GAGCCATATAATAGCTTGCGTAATCTATATTGAATTATTATAAATGGATAATGAAGGTGCATATTTGGTCTCCCTCTTTACGTTATCCAT  
CTTTATTGCCATATTTTTCAAACCTTGCAACTTCCAAGTAATGATTTTCCTTTCCAACCTTCTCATAAGAGAGACGTTGCATGTAAGTT  
ATTGAATAAGGCAAATAAAGGGAAATTACAATCCCTCATGTTAATATGTACCCTAATTTGTATCTAAACGAAAAGTACTTCGTTGCCT  
TTTTATCATCATCTTTTATATGTCTTTTAAATATTTAAATTACGGAATACTGTAACCTTATATAGTACTTCTTAGTTCATGACCAAATTGG  
TTAATTCGATTTTCGATCTCCTTTTGCTTTGGAACAACCGTTAGTATGAAGATAATTTTGAGCTAGTTTTTTTTTTGGTTTCCCAAGGTAA  
CCCCACAGCCGGCAGTCGTGAGACTAATCTTCCGTTTCTATGGTCAGCGCACTAAGCGGTAAGGAACTGGCCACTGAGTTTTTTCC  
ATTCATTAGAGGTGGGGATCGAACCCCCAGCCTCTTGCTTAAAAGGTGAGGTACTGAATCACCACACCAACTCTTGTGGTTAATTTT  
GAGCTAGTTGACTAGTTGAAGAGCATTGAGCCAAAGTACGTAAAGGAGGATAAAGTCGACATATTTAGGATATTTTTGGCCCTTT  
ATAACTTGTTTTAACATGTTACATGCCTCATTTTCTTCATATTATTATTGCACTTACTTAAACAGTGTGAAAGTTATTGATTAATGTGT

ATAATAAATTGAACTCAATTACGCACACGAATCATTCTCACGTATAGTATATAGTTTTCTAACTTTTACACATAATTGGTGTGTTCCCA  
AATTTTGAGCTTTGTCAAAAACAAAATGGTAGACACCCAAAATTTGTGCACTCTACGAAAAAAATTCAATTTATGTTAGAATTTTT  
AGAGTTTTAAAATTCGTGCACTCTTCGAGAAGAACCCAAATTCTGTTATAGTTCTTGGAGTTTACTCTAAGGGCAAATGGCATTACA  
AAAACCTCCGAATATTCATAAAGAGATCAAAGTCTTTCTTCTTGATAATCAAATACATCAAGAAGATACACAAACACTCCATCTTTTT  
TATGGAGATGAAATCCAAATATTGTTACGTTTCGAGAAATACGCTACTAACAGTCCTCGAATTACGGAAAAATTCATATCAAATTCAA  
ATATTCCTAAGTTTGAGAAATACGCTATTGACGGTCCTCGAATTACGGAAAAATTTATATCAAATTCAAATATTTCTATGTTTCGAGAA  
ATACGCTACTGACGATCCTAAAATTACGGATAAATTCATATCAAATTCAAATATTTCTATGTTTCGAAAAATACGCTACTGACGAACCT  
AGAATTATGGAGAAAATCAAGAGAGGGAATCAAGGAAAAATAAATTTGTAGCCACATCATTTATCAATAAAAAATCATGTTTCTTC  
ATATTTTACGTGTGATTGCAATTTATTATTCATAAAAAATTATTGGAAACAATTATGGCAGGCGTAAAGATGGAAGCTCTATGGGTAC  
TTCAAGATTCATCTTAGAGTTTATCAAGTCTACACACCGACAAGCATTGAAGTGGACATTTGTAGACATCGAAAATTTGTGGACTCT  
ACAAGAAGAATTCAATTTCTGTTAGAGTTTGTAGAGTTGTAAAATTTGTGACTCTTCAAGAAG

CaCEL2 (Capana08g002622)

GATACAGACCTTAGTTTAGGGACCTATGTGAATTTTCGGAACAACCTTTGAGGTCCTATTGATGGGTTTAACTTTTACCTTCTATAGT  
GTTATACATGCGCATCTAAACCGACAAAACATGCAAGGGTGTTTTGATACTCCATCCATTTTATAATAAATAAATTATTGCATTTTGAC  
ACATATATTAAGAAAAAATATTAAGACATGAATTTAACACAAGTTTTGATTTTACTCAAAAAAAGAAAAAGTTGACCTTGCAAT  
ACTTTTTCAAAGTTAATTGGTTGTCAAATCATAAGGACAAATTTTTAAAAAATTCAATGATTCACTTCTTTTGAAACAGCAATAA

ATACCCCAACAATTCACCTTATTCCGAAATGGAGGGAGTAATATTTTTGGTGAAAATAATGAATTAATAAATAAATAAATAATATAATATCCGA  
AGTTTAAGTTGAAGTTGAAAAGGGGTGCAGTTTGGTTTTTGGGAATAAGATGGGATATTTAGAATTACGTTTATACTTTTAATAAAAATA  
CAGTATAAATTTAATCTCAAACCTATTTCTTATCCTATCAAATAGGTGTCATGTTATATCACTGTCTTTAAAATTCTAGGATTATAATTT  
CAGTACAATTTAATTCGCAAATCAAATGATCATAGTGTCTGGACATAAATTCATTAGCGAAGATGGTTTAATTTTTCTATTTTAAAT  
TAAGTATCTTAATTTGACTAAATGAAGTTTACGATACAGTTCATTATCTAATCTTCATCCTCAAACCTCCCACTCCCAATCCTTTCCAAC  
CTTCACAGTGATGTGTTAGATTGTACATGTTTTTAATTTACTTATCAAATATTAATAAATAATGTAAGACACTTATTTTTTGAAAATTTTT  
TCTTTCTTAAAAACATTTTCCTAGCACACCCAAAGTAGTGAAAAATAACAACAATAATATACCTAGTGAAATCCCACAAGTCATGAAGTCT  
CGGGAGGACGCAGACCTTACCGGCCACTAACTCGGAGAGATAGGGAGGTTGTTTTCGAAAAACAAGTGGGTGGGAATAGTTGGAGTAGCT  
AGATTAGAAAACAAAAATTAGAGGGACATAAAATAAAGAAAGAGGTAATGTAAGTCACATTTCTCTTTGCATGTGAATTTTAACTGACACT  
GCCTTCTTTTGTCTTTCTGTCCGGCGCTTATTTGCTTTCCTTTCCTCCTCCAATCTCTGCTCTCTATTTTTCCACTCCCGTGATCCT  
TTCCTTTCCTTTTCTTTATTTTCCAACCAATAATACTTTATTCAATTTACAATTAATAAATAATATCTACATTTTTATGCTGATTTTAAAAG  
TAGTATATATTGATTTGGCGCGATTTTTTTTTTTTTTTTACTTGTAAGTTAAAATTTAGTAAGATTTTTAAACACCATGTAGTTATTGGT  
GTTTATGGTGTAGTCTAGAAAATAATCAATTCTTAAGTTGAAATTGCAGGTTAGACATAACAATCGATAATTTCTTTTAATCTGTCTT  
AATTTTGATAAATAAATAACTTGATTCCTATTATGGATACAATTGAGATGCATTCAGGCTTATTCGAATACCATGAGTATTTAAAAGA  
AAATTATAATTTGTGTGTATAAATAACCTTTGACACTTGTTATCTTAAATATGTTAAATATTTGTGTGATAAATAATTTCTTATTACAAATA  
AAATTTAAAATTTATAGTTAAATATTTTAAATATAATAACATGTCATTTTAGAAACACATTATTTCTTATTAATAAATAAATAAATTTAAATTT  
ATAGTTAAATATTTTAAATATAATAACATATCATTTTAGAAACATACTCCTATTAATTAGTAGAAAATATCAGCGTGTAACCTCACAAGT

TTTTCAATAAAAATAATTAATTTTATATTTTTTTTCAATAAAAATTCTAATTTTGTCCCTGTTAACATAATCACAAGTTTAACTCTACAA  
AGTAGTATACACTATACCATAAAAATAAA

Figure S1. TSS up-stream regions for McrBC-PCR and bisulfite sequencing. Fragments analyzed with McrBC-PCR are shown in underline. For the bisulfite sequencing, Sequences analyzed with bisulfite sequencing are in italic and marked either by gray (PCR fragment 1) or by dark gray (PCR fragment 2)..

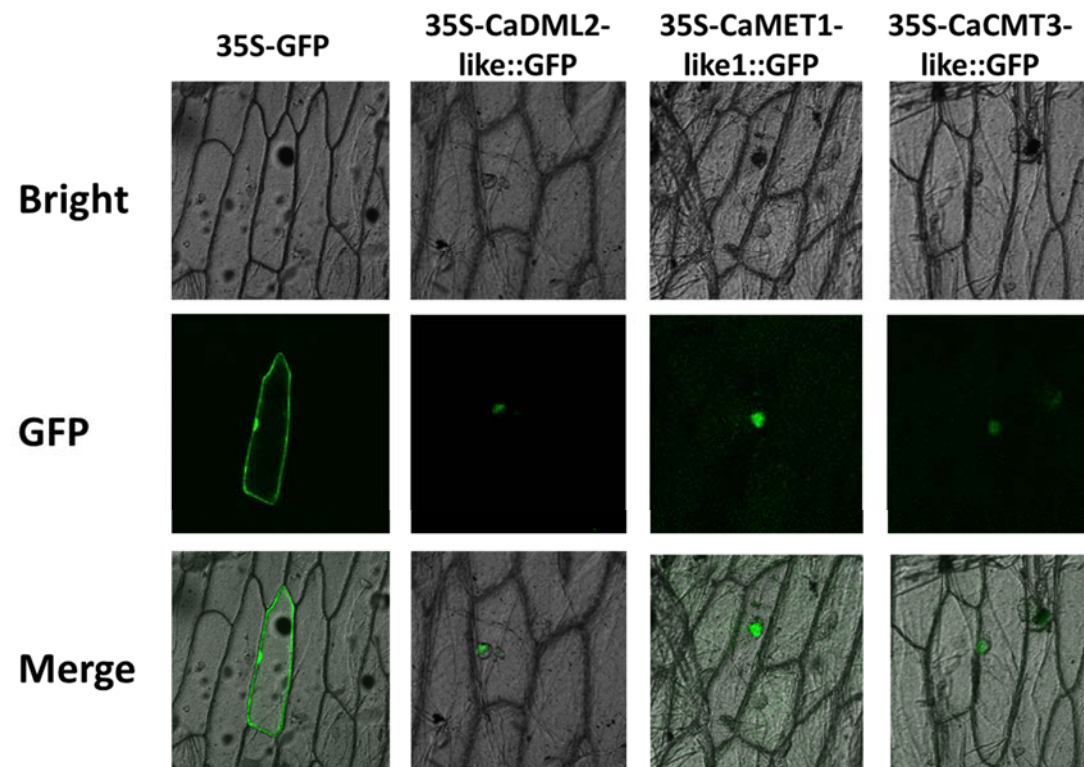

Figure S2. Subcellular localization of CaDML2-like, CaMET1-like1, CaCMT3-like in onion epidermal cells.

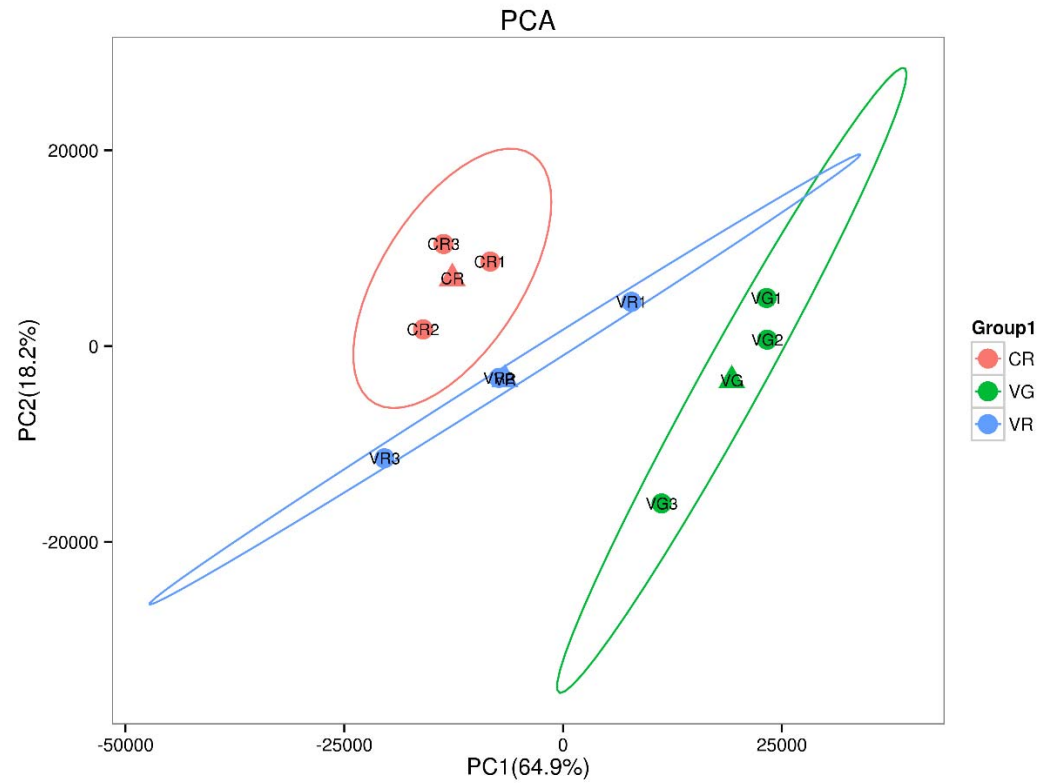

Figure S3. PCA of the RNA-seq samples. CR, VG and VR indicate red-ripe negative control pericarp, green and premature-ripe pericarp of the *CaMET1-like1*-silenced fruit, respectively.

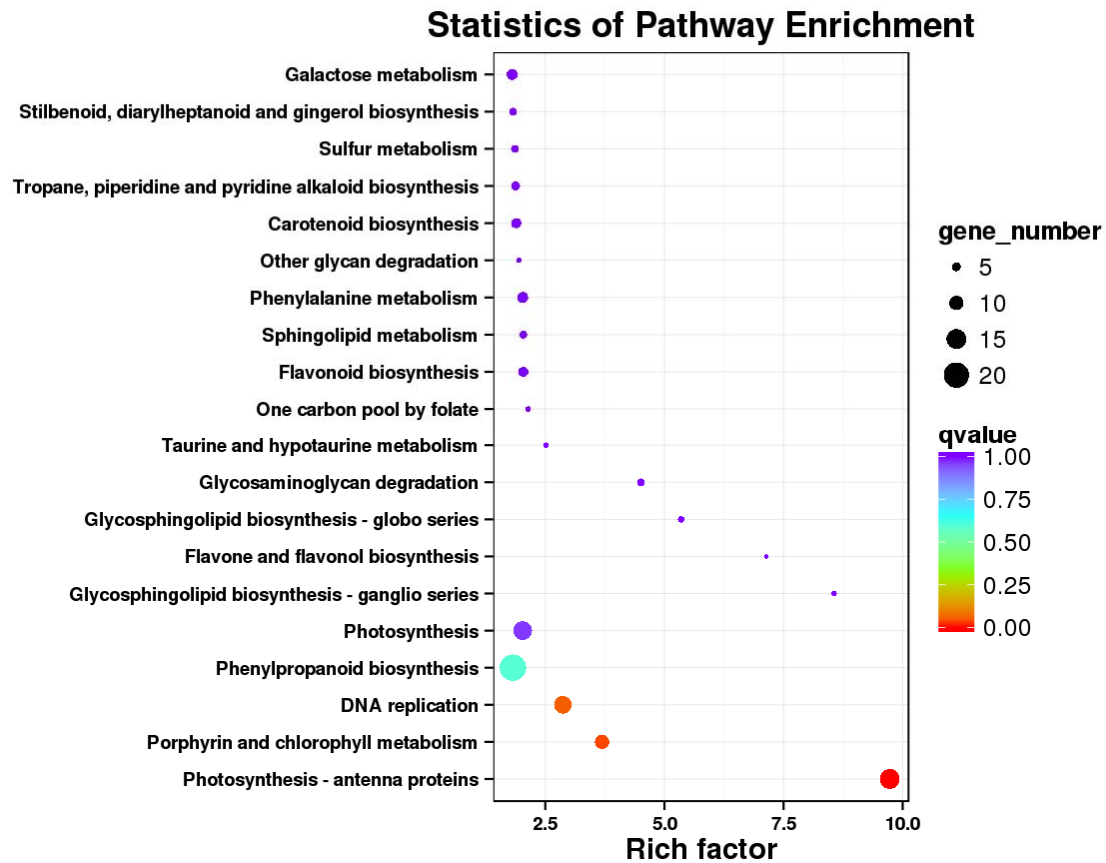

Figure S4. Statistics of pathway enrichment of the DEGs between the premature-ripe pericarp of the *CaMET1-like1*-silenced fruit and the red-ripe pericarp of the negative control fruit.

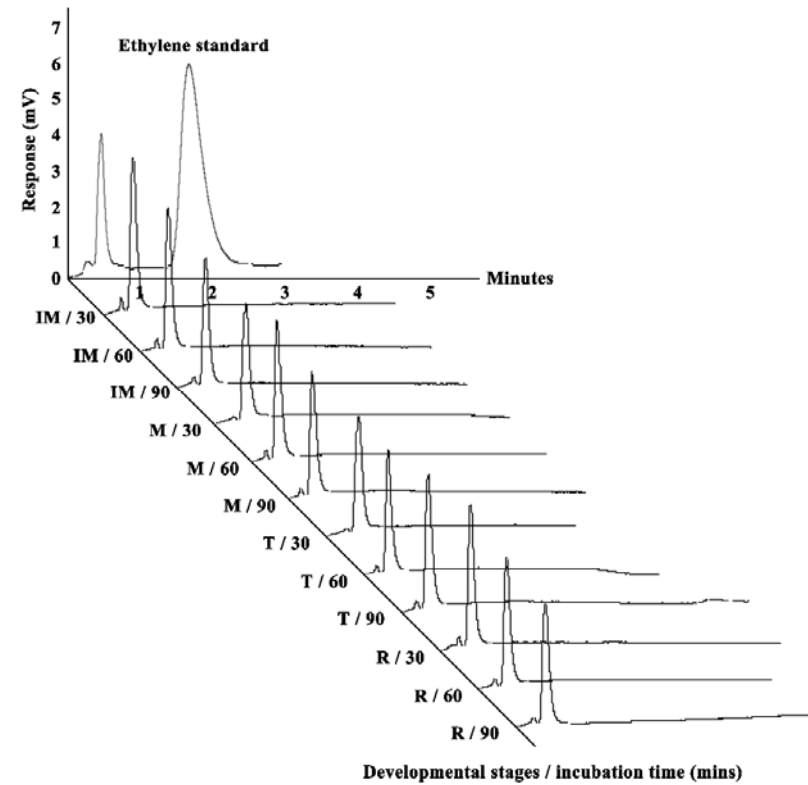

Figure S5. Ethylene production of pepper fruits at different developmental stages. “IM”, “M”, “T” and “R” indicate immature green, mature green, turning and red ripening stages.
